# Supplementary material for: Tuning the Cu+ species of Cu-based catalysts for direct synthesis of ethanol from syngas
Source: Royal Society of Chemistry journal article supplement (doi:10.1039/d1nj04339k), 2021-01-01
Supplement: d1nj04339k1.pdf [file d1nj04339k1.pdf]

***Supplementary material for***  
**Tuning the Cu<sup>+</sup> species of Cu-based catalysts for direct  
synthesis of ethanol from syngas**

**Jiaqian Yang,<sup>a,b</sup> Nana Gong,<sup>a,b</sup> Liyan Wang,<sup>a,b</sup> Yingquan Wu,<sup>\*a</sup> Tao Zhang,<sup>a</sup>  
Hongjuan Xie,<sup>a</sup> Guohui Yang<sup>a</sup> and Yisheng Tan<sup>\*a,c</sup>**

<sup>a</sup> State Key Laboratory of Coal Conversion, Institute of Coal Chemistry, Chinese Academy of Sciences, Taiyuan 030001, China

<sup>b</sup> University of Chinese Academy of Sciences, Beijing 100049, China

<sup>c</sup> National Engineering Research Center for Coal-Based Synthesis, Institute of Coal Chemistry, Chinese Academy of Sciences, Taiyuan 030001, China

**Contents**

**Fig. S1.** XRD patterns of the spent catalysts.

**Fig. S2.** Deconvoluted XPS spectra of Cu 2p<sub>3/2</sub> of the reduced catalysts.

**Fig. S3.** The catalytic performance of xCu/yCuPS catalysts as a function of Cu<sup>+</sup>/(Cu<sup>+</sup>+Cu<sup>0</sup>).

**Fig. S4.** CO conversion and alcohol distribution as a function of time-of-stream of the 0.33Cu/0.67CuPS catalyst at 300 °C and 5 MPa.

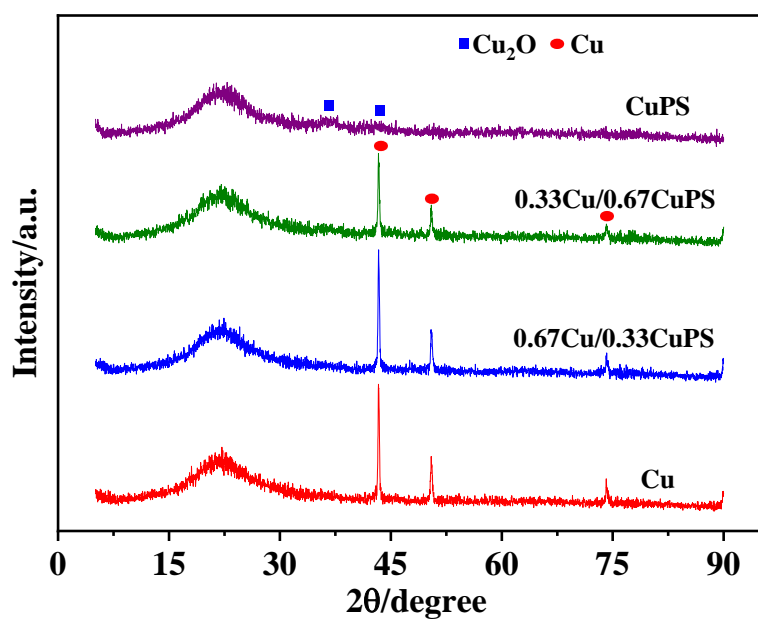

Fig. S1. XRD patterns of the spent catalysts.

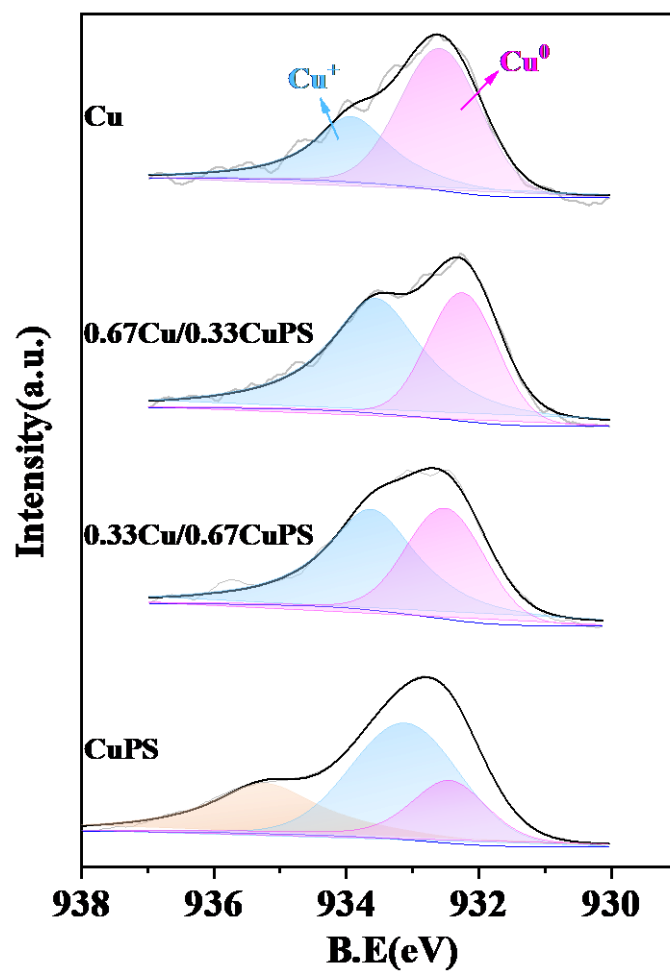

Fig. S2. Deconvoluted XPS spectra of Cu 2p<sub>3/2</sub> of the reduced catalysts.

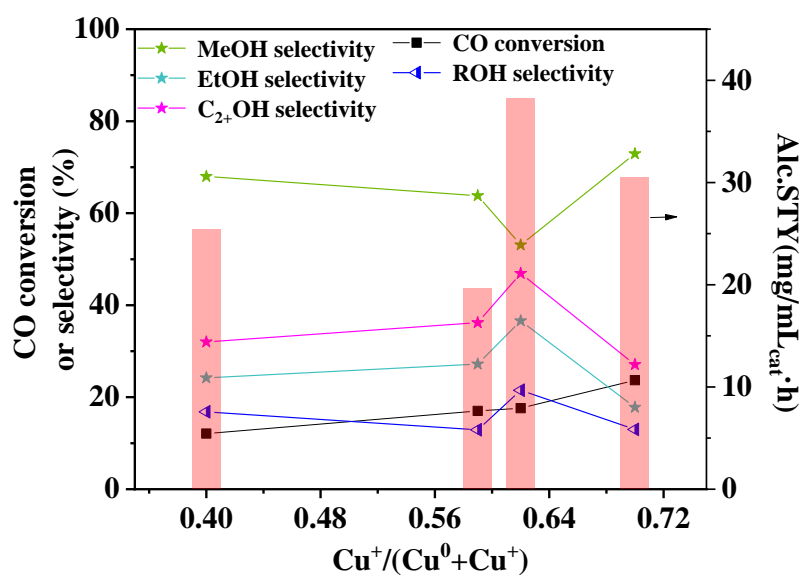

**Fig. S3.** The catalytic performance of  $x\text{Cu}/y\text{CuPS}$  catalysts as a function of  $\text{Cu}^+ / (\text{Cu}^0 + \text{Cu}^+)$ .

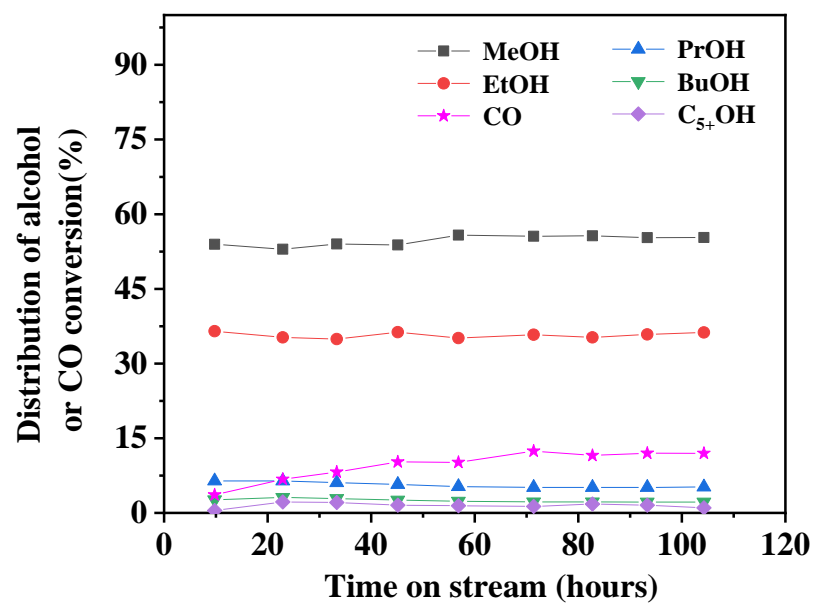

**Fig. S4.** CO conversion and alcohol distribution as a function of time on stream of the 0.33Cu/0.67CuPS catalyst at 300 °C and 5 MPa.
